# Supplementary material for: Superhydrophilic edge-rich graphene for the simultaneous and disposable sensing of dopamine, ascorbic acid, and uric acid
Source: Royal Society of Chemistry journal article supplement (doi:10.1039/d1tb02620h), 2022-01-01
Supplement: d1tb02620h1.pdf [file d1tb02620h1.pdf]

## **Electronic Supporting Information (ESI)**

# **Superhydrophilic edge-rich graphene for the simultaneous and disposable sensing of dopamine, ascorbic acid, and uric acid**

Tuotuo Ma, Jiachen Meng, Qiang Song\* and Dan Wen\*

*State Key Laboratory of Solidification Processing, School of Materials Science and Engineering, Northwestern Polytechnical University and Shaanxi Joint Laboratory of Graphene (NPU), Xi'an 710072, P. R. China*

\*Corresponding authors.

E-mail addresses: [dan.wen@nwpu.edu.cn](mailto:dan.wen@nwpu.edu.cn) (D. Wen), [songqiang511@nwpu.edu.cn](mailto:songqiang511@nwpu.edu.cn) (Q. Song)

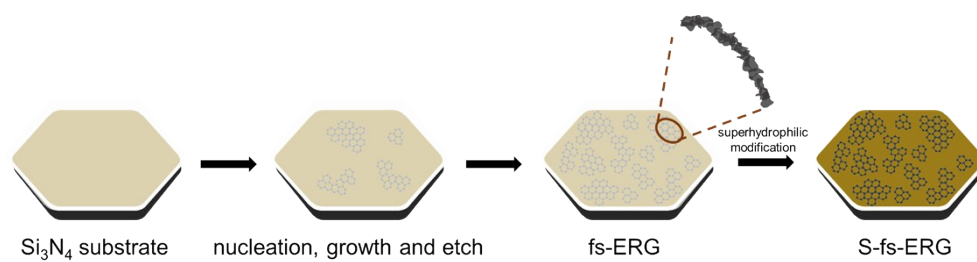

**Scheme S1.** Schematic diagram for preparation of the S-fs-ERG.

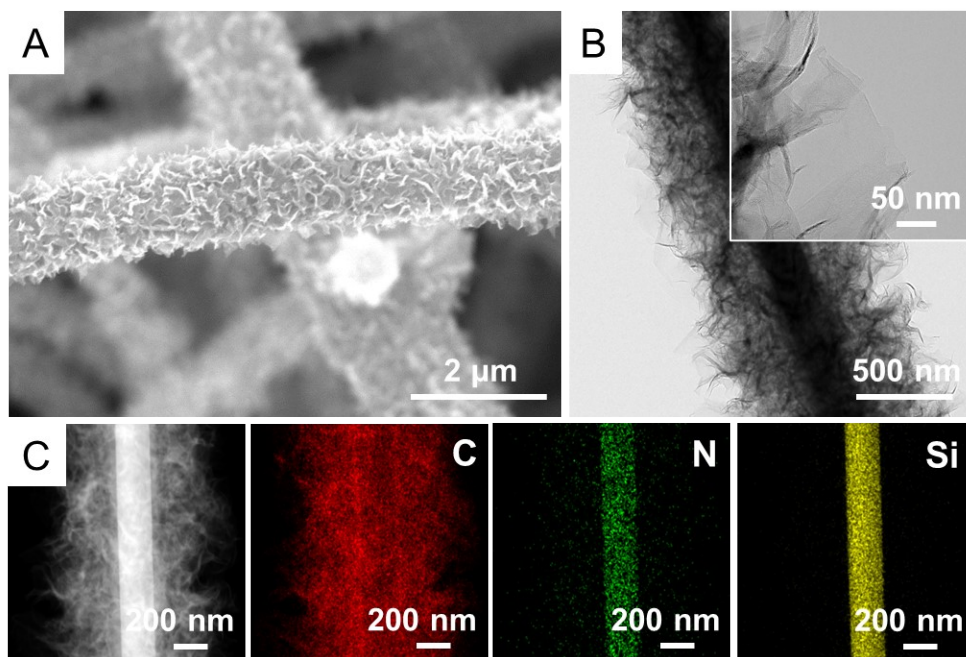

**Fig. S1** SEM (A), TEM (B) and corresponding TEM-EDS (C) images of the fs-ERG.

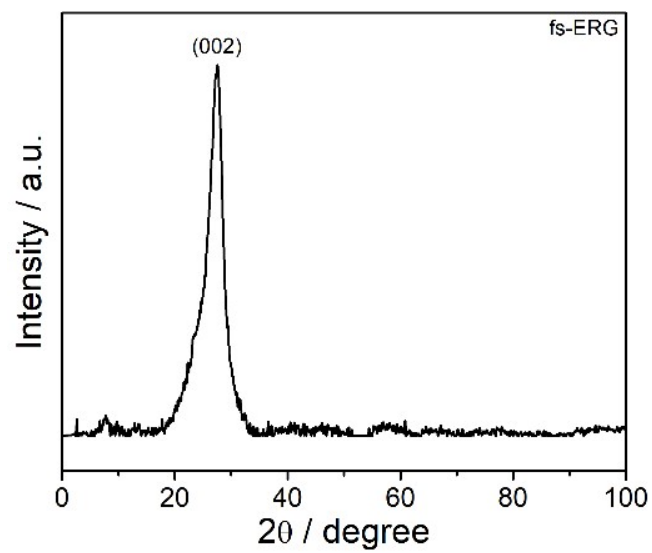

**Fig. S2** XRD pattern of the fs-ERG.

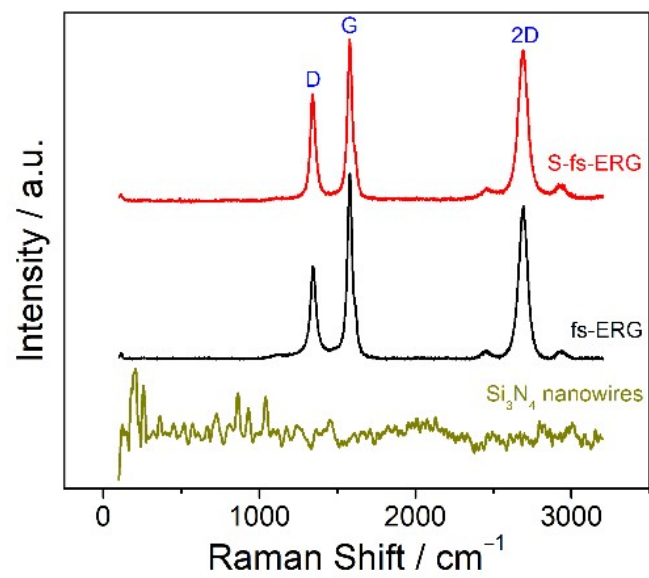

**Fig. S3** Raman spectra of the Si<sub>3</sub>N<sub>4</sub> nanowires, fs-ERG, and S-fs-ERG.

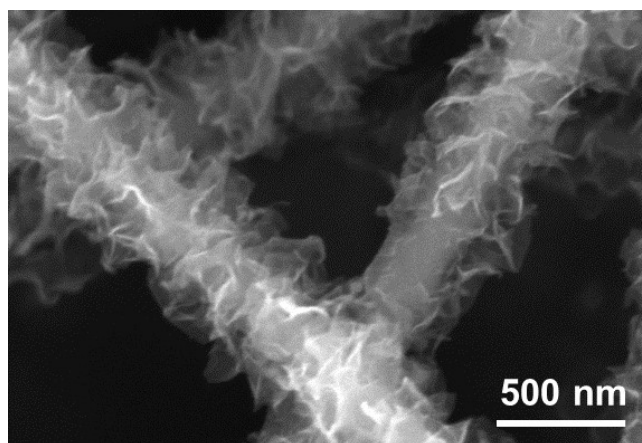

**Fig. S4** SEM image of the S-fs-ERG. A small number of fs-ERG nanoplanes were falling-off from the Si<sub>3</sub>N<sub>4</sub> nanowires after KOH thermal treatment.

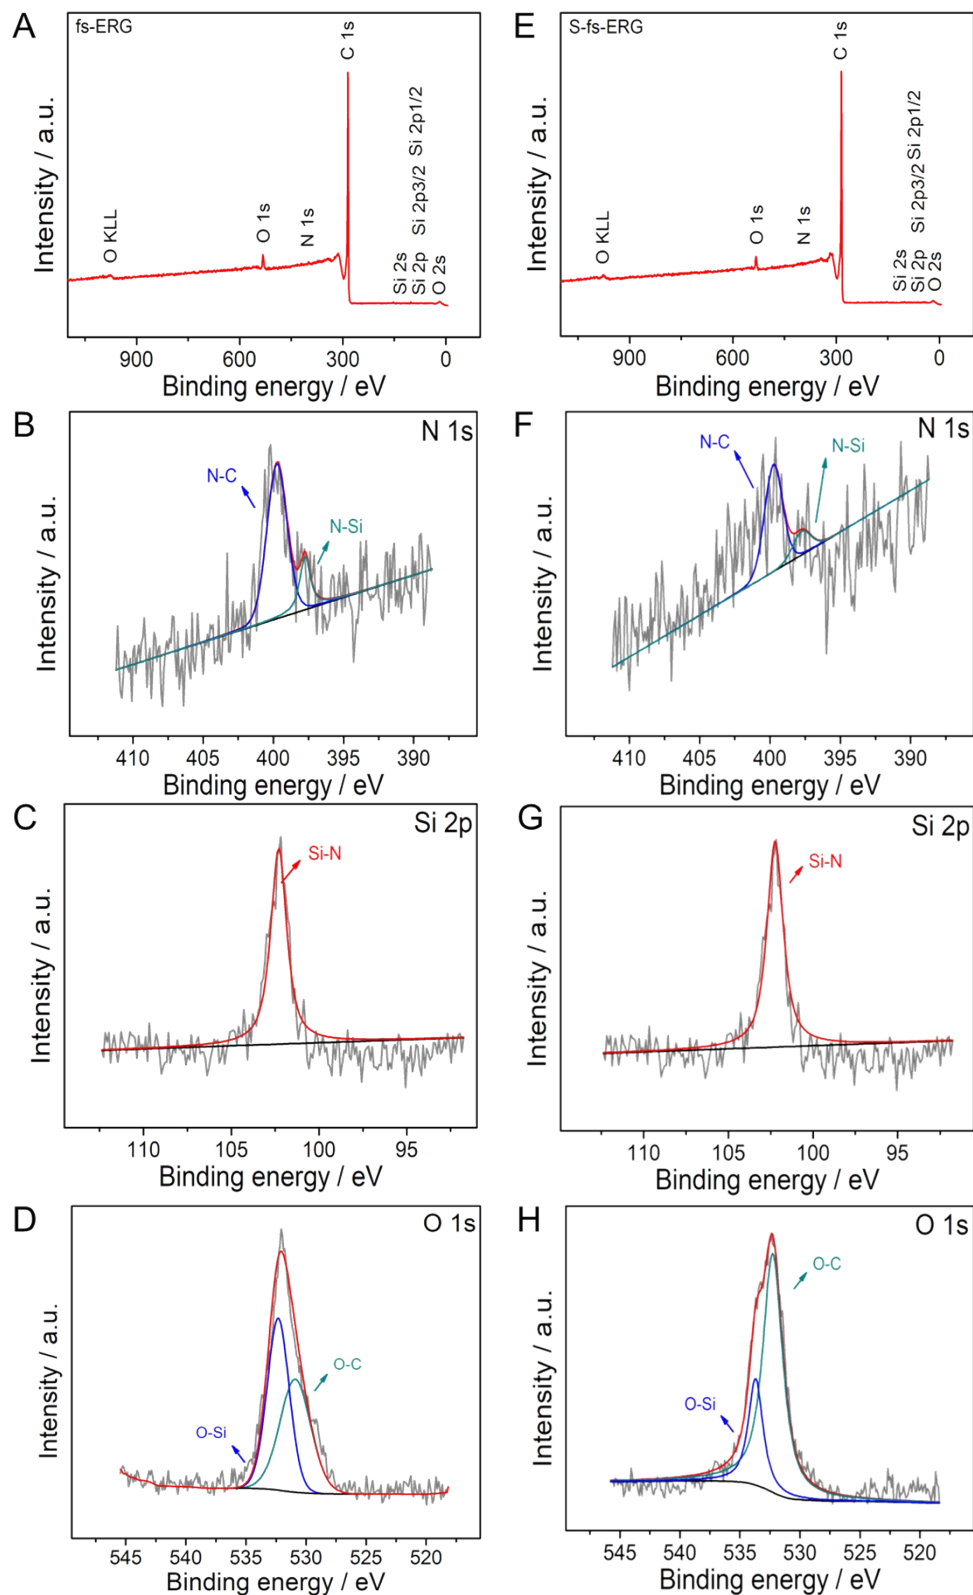

**Fig. S5** XPS wide scan (A, E) and high-resolution N 1s (B, F), Si 2p (C, G), and O 1s (D, H) spectra of the fs-ERG (A, B, C, D) and S-fs-ERG (E, F, G, H), respectively.

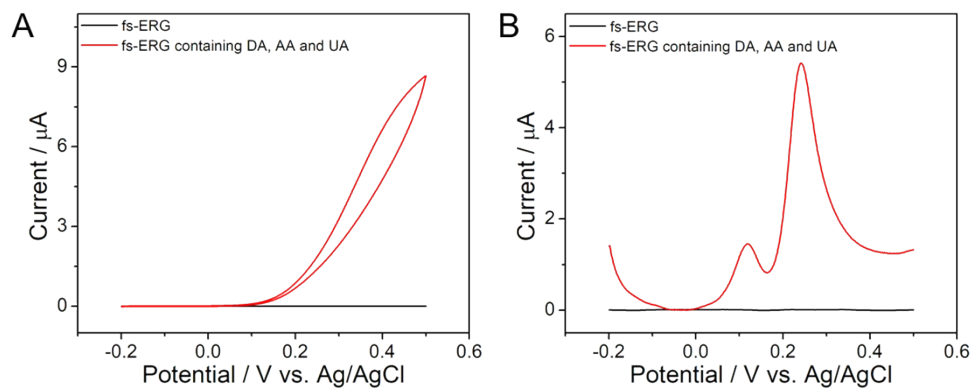

**Fig. S6** CV (A) and DPV (B) curves of the fs-ERG electrode in the absence and presence of 0.02 mM DA, 1 mM AA and 0.05 mM UA in 0.1 M PBS (pH 7.4). The scan rate for CV is  $50 \text{ mV s}^{-1}$ . The pulse amplitude for DPV is 50 mV.



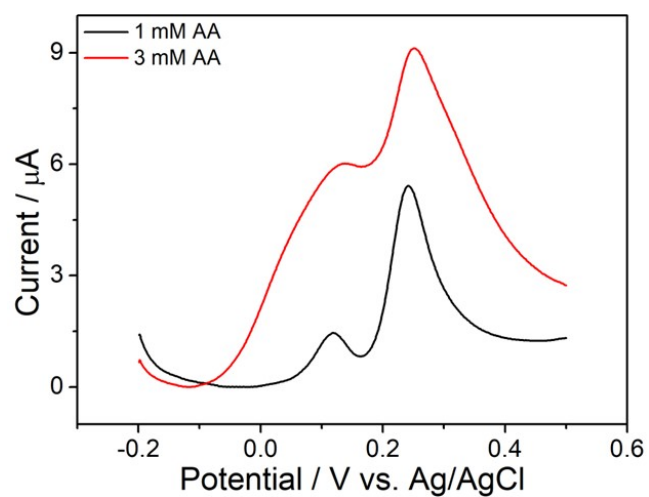

**Fig. S7** DPV curves of the fs-ERG electrode containing 0.02 mM DA and 0.05 mM UA with different concentrations of AA in 0.1 M PBS (pH 7.4).

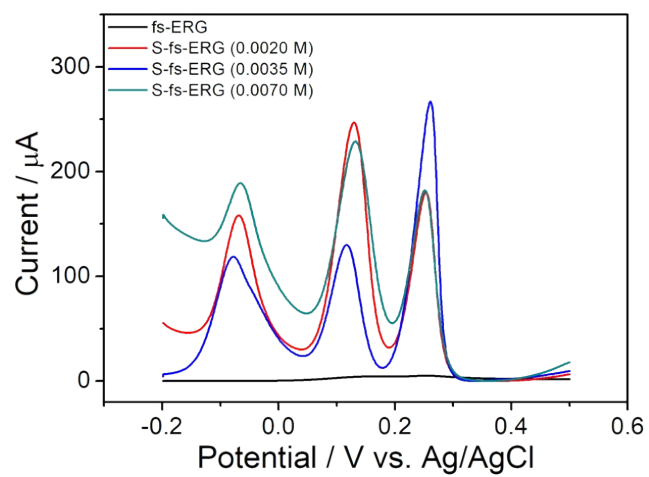

**Fig. S8** DPV curves of the fs-ERG and S-fs-ERG electrodes after different concentrations of KOH thermal treatment containing 0.02 mM DA, 1 mM AA and 0.05 mM UA in 0.1 M PBS (pH 7.4).

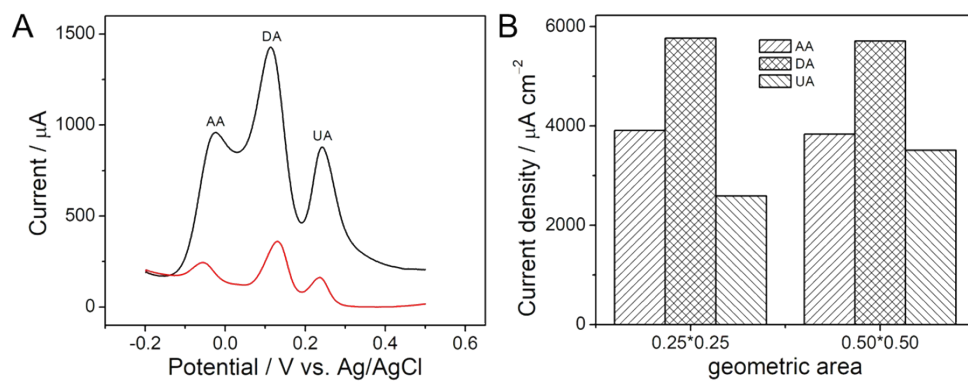

**Fig. S9** DPV curves of the S-fs-ERG electrodes with different dimensions of  $0.25 \times 0.25$  cm (red line) and  $0.50 \times 0.50$  cm (black line) (A) and the corresponding histograms of the current density responses (B) containing 0.02 mM DA, 1 mM AA and 0.05 mM UA in 0.1 M PBS (pH 7.4).

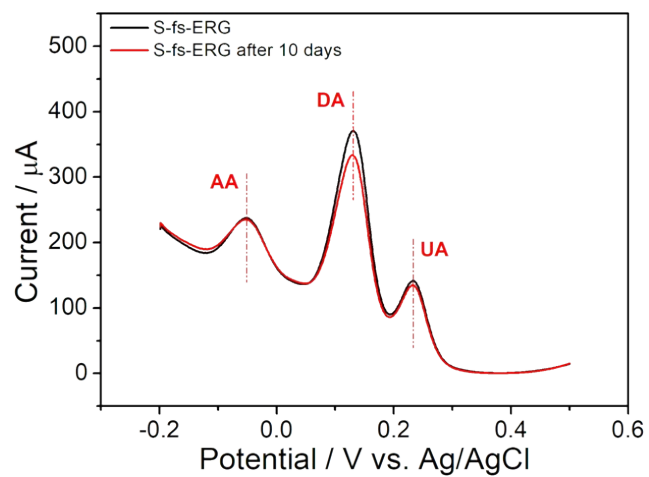

**Fig. S10** DPV curves of the S-fs-ERG electrode containing 0.02 mM DA, 1 mM AA and 0.05 mM UA for stability test.

**Table S1** The TEM-EDS element analysis of the fs-ERG (A) and S-fs-ERG (B).

| (A) | Element<br>(Family) | Atomic<br>Fraction<br>(%) | Mass<br>Fraction<br>(%) | (B) | Element<br>(Family) | Atomic<br>Fraction<br>(%) | Mass<br>Fraction<br>(%) |
|-----|---------------------|---------------------------|-------------------------|-----|---------------------|---------------------------|-------------------------|
|     | C (K)               | 92.97                     | 85.67                   |     | C (K)               | 96.00                     | 91.80                   |
|     | N (K)               | 0.00                      | 0.00                    |     | N (K)               | 0.00                      | 0.00                    |
|     | Si (K)              | 7.03                      | 14.33                   |     | Si (K)              | 3.68                      | 7.78                    |
|     |                     |                           |                         |     | O (K)               | 0.32                      | 0.41                    |
|     | Total               | 100.00                    | 100.00                  |     | Total               | 100.00                    | 100.00                  |

**Table S2** The atomic content changes about C, N, Si and O elements of the fs-ERG and S-fs-ERG.

| Atomic contents (%) | C     | N    | Si   | O    |
|---------------------|-------|------|------|------|
| fs-ERG              | 92.46 | 0.92 | 3.59 | 3.04 |
| S-fs-ERG            | 94.19 | 0.82 | 1.85 | 3.14 |

**Table S3** Comparison of the differently modified electrodes for electrochemical determination of the DA, AA and UA.

| Electrode                      | Linear range / $\mu\text{M}$ |          |        | Limit of detection (LOD) |      |      | Refs      |
|--------------------------------|------------------------------|----------|--------|--------------------------|------|------|-----------|
|                                | DA                           | AA       | UA     | DA                       | AA   | UA   |           |
| 2D-hBN <sup>a</sup>            | 3–75                         | N.A.     | N.A.   | 0.65                     | N.A. | N.A. | 1         |
| NOCC <sup>b</sup>              | 0.3–55                       | 10–1300  | N.A.   | 0.18                     | 3.41 | N.A. | 2         |
| Pt@NP-AuSn/Ni/CFP <sup>c</sup> | 1–10                         | 200–2000 | 25–800 | N.A.                     | N.A. | N.A. | 3         |
| BG-CNPs <sup>d</sup>           | 5–2535                       | 10–3570  | 5–220  | 0.7                      | 1.1  | 2.4  | 4         |
| S-fs-ERG                       | 0.1–50                       | 2.5–1000 | 0.5–50 | 0.1                      | 2.5  | 0.5  | This work |

**Note:** The low detectable limit as evaluation index in this work.

N.A.: not available.

<sup>a</sup>: 2D hexagonal boron nitride

<sup>b</sup>: nitrogen/oxygen-codoped carbon cloth

<sup>c</sup>: Pt nanoparticles modified nanoporous AuSn(Pt@NP-AuSn) alloy on Ni buffered flexible carbon fiber paper (CFP)

<sup>d</sup>: biomass derived ground cherry husks derived carbon nanoplates

1. A. F. Khan, D. A. C. Brownson, E. P. Randviir, G. C. Smith and C. E. Banks, *Anal. Chem.*, 2016, **88**, 9729–9737.
2. X. Xi, D. Wu, W. Ji, S. Zhang, W. Tang, Y. Su, X. Guo and R. Liu, *Adv. Funct. Mater.*, 2019, **30**, 1905361.
3. H. Yang, J. Zhao, M. Qiu, P. Sun, D. Han, L. Niu and G. Cui, *Biosens. Bioelectron.*, 2019, **124–125**, 191–198.
4. X. Li, H. Li, T. Liu, Y. Hei, M. Hassan, S. Zhang, J. Lin, T. Wang, X. Bo, H.-L. Wang, H. Li and M. Zhou, *Sens. Actuators B Chem.*, 2018, **255**, 3248–3256.
